# Supplementary material for: Synthesis, Characterizations, and Quantum Chemical Investigations on Imidazo[1,2-a]pyrimidine-Schiff Base Derivative: (E)-2-Phenyl-N-(thiophen-2-ylmethylene)imidazo[1,2-a]pyrimidin-3-amine
Source: PubMed Central journal article supplement — ACS Omega. 2023 Dec 15;9(1):837–57. doi: 10.1021/acsomega.3c06841 (PMC10785637; doi:10.1021/acsomega.3c06841), 2023-12-15
Supplement: ao3c06841_si_001.pdf [file ao3c06841_si_001.pdf]

## ***Supporting Information***

Synthesis, Characterizations, and Quantum Chemical Investigations on  
Imidazo[1,2-a]pyrimidine-Schiff base derivative : (E)-2-phenyl-N-(thiophen-2-  
ylmethylene)imidazo[1,2-a]pyrimidin-3-amine

Mohamed Azzouzi<sup>a\*</sup>, Omar Azougagh<sup>a\*</sup>, Abderrahim Ait ouchaoui<sup>b</sup>, Salah eddine El hadad<sup>b</sup>,  
Stéphane Mazières<sup>c</sup>, Soufian El Barkany<sup>a</sup>, Mohamed Abboud<sup>d\*</sup>, Adyl Oussaid<sup>a</sup>.

<sup>a</sup>*Laboratory of Molecular Chemistry, Materials and Environment (LCM2E), Department of Chemistry, Multidisciplinary Faculty of Nador, University Mohamed I, 60700 Nador, Morocco.*

<sup>b</sup>*Laboratory of Medical Biotechnology (MedBiotech), Bionova Research Center, Medical and Pharmacy School, Mohammed V University, B.P 8007, Agdal, Rabat, Morocco*

<sup>c</sup>*Laboratory of IMRCP, University Paul Sabatier, CNRS UMR 5623, 118 route de Narbonne 31062 Toulouse, France.*

<sup>d</sup>*Catalysis Research Group (CRG), Department of Chemistry, College of Science, King Khalid University, P.O. Box 9004, Abha, 61413, Saudi Arabia*

\*Corresponding authors: Mohamed Abboud ([abboud\\_med@yahoo.fr](mailto:abboud_med@yahoo.fr))

\*These authors contributed equally

**<sup>1</sup>H-NMR, <sup>13</sup>C-NMR, <sup>13</sup>C-NMR (DEPT 135), FT-IR and LC-MS(ESI<sup>+</sup>) of (E)-2-phenyl-N-(thiophen-2-ylmethylene)imidazo[1,2-a]pyrimidin-3-amine (3)**

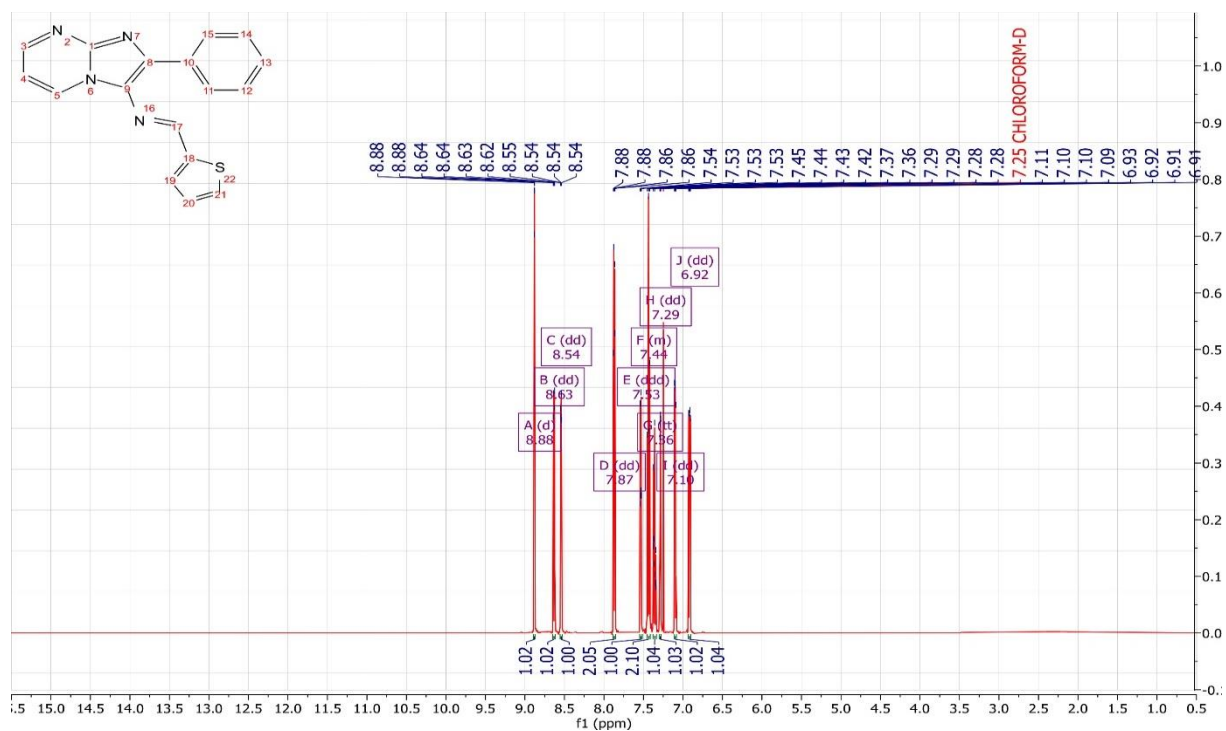

Figure S1. Experimental <sup>1</sup>H NMR spectra of compound (3)

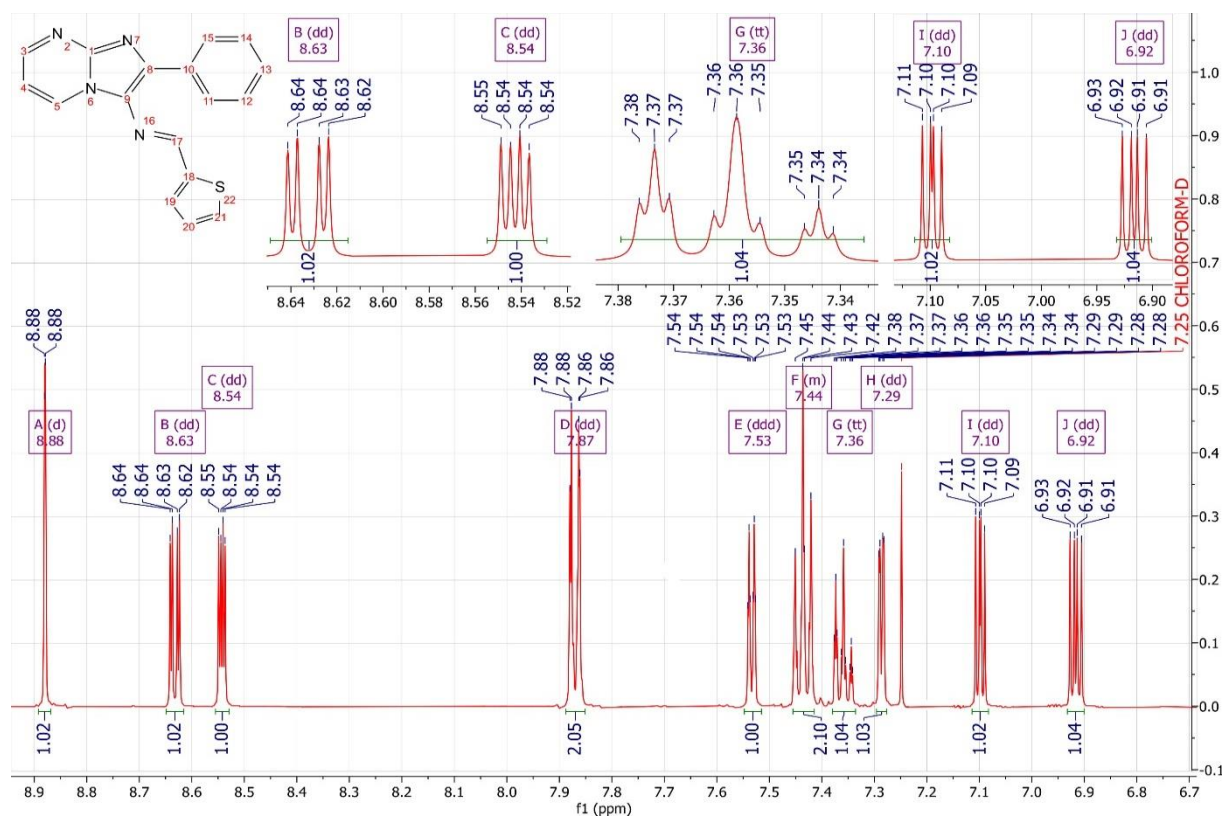

Figure S2. Experimental <sup>1</sup>H NMR spectra of compound (3)

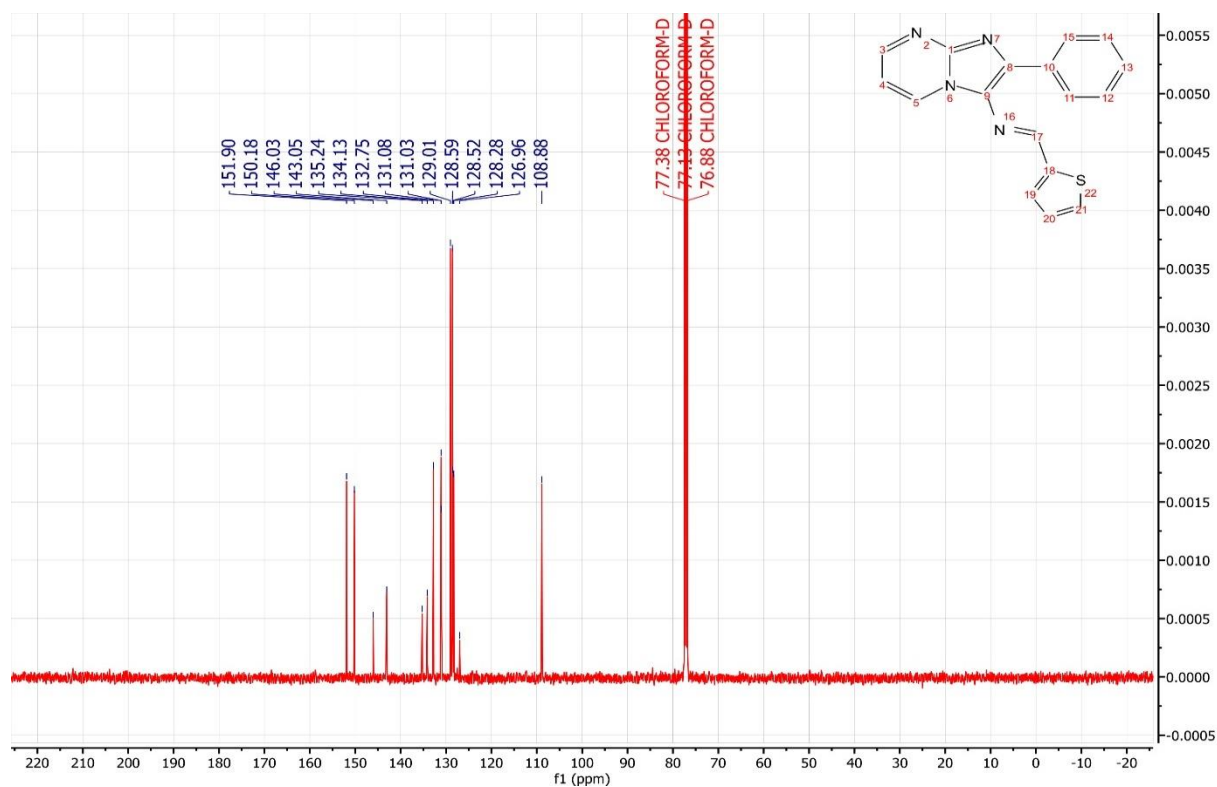

Figure S3. Experimental  $^{13}\text{C}$  NMR spectra of compound (3)

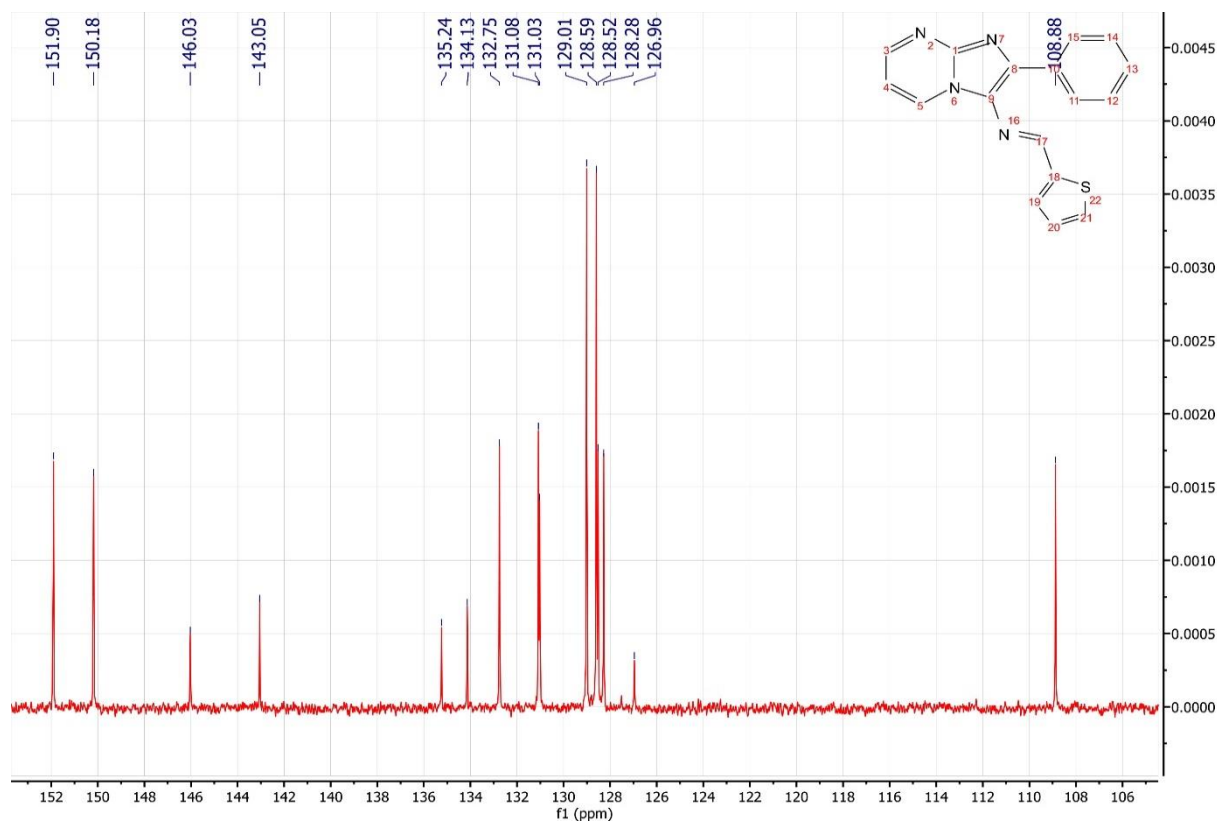

Figure S4. Experimental  $^{13}\text{C}$  NMR spectra of compound (3)

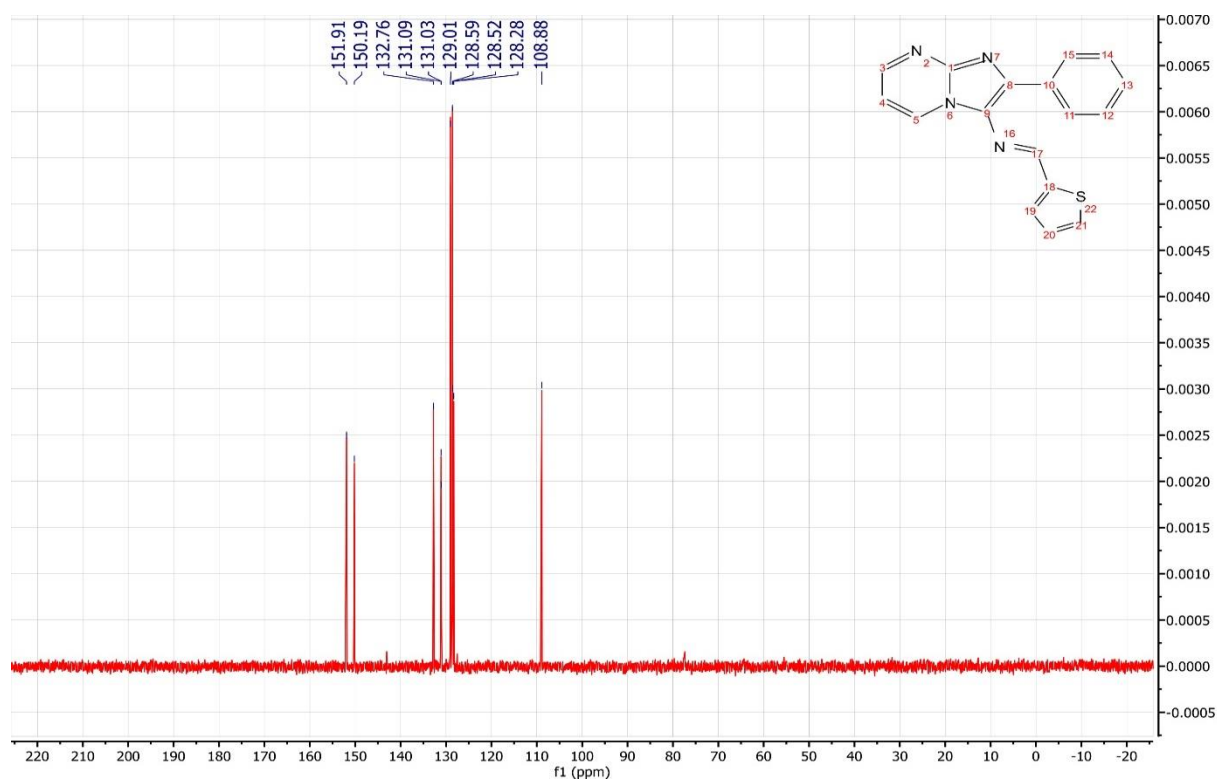

Figure S5. Experimental  $^{13}\text{C}$  NMR DEPT 135 spectra of compound (3)

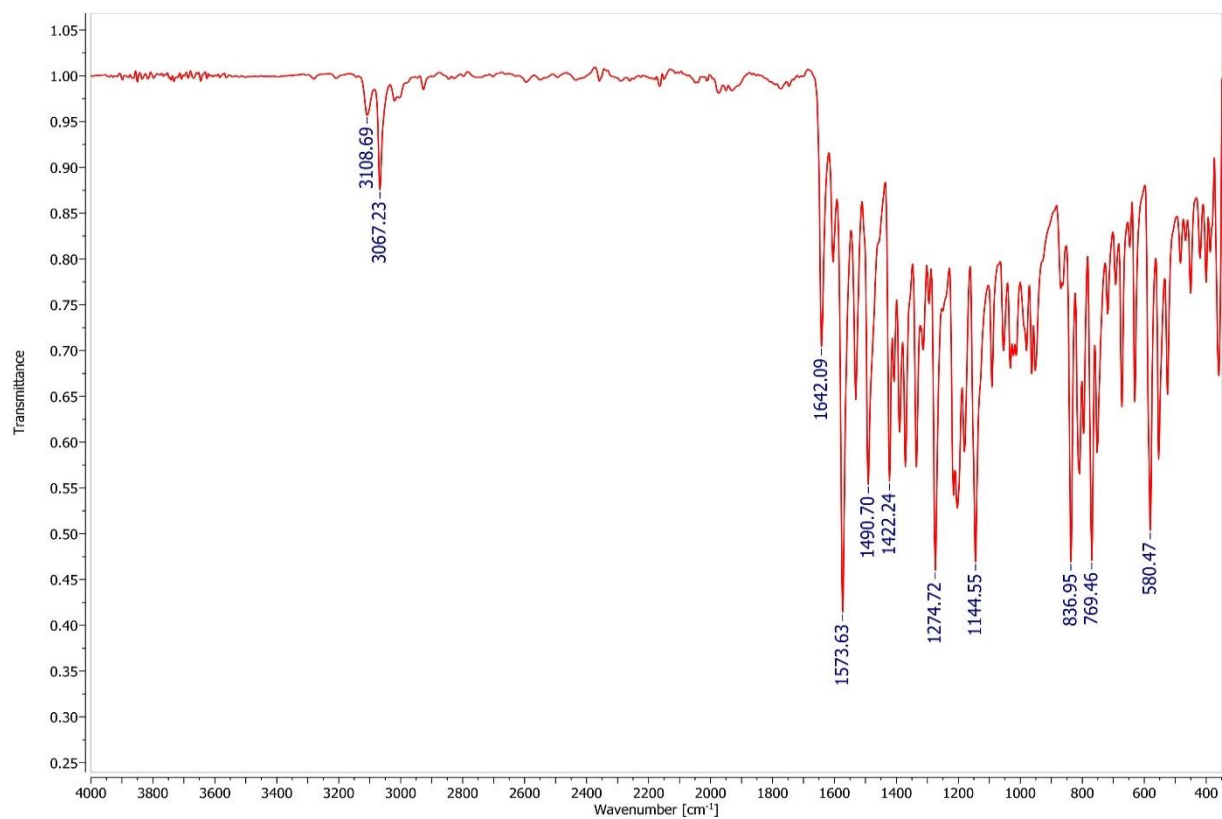

Figure S6. Experimental FT-IR spectra of (3)

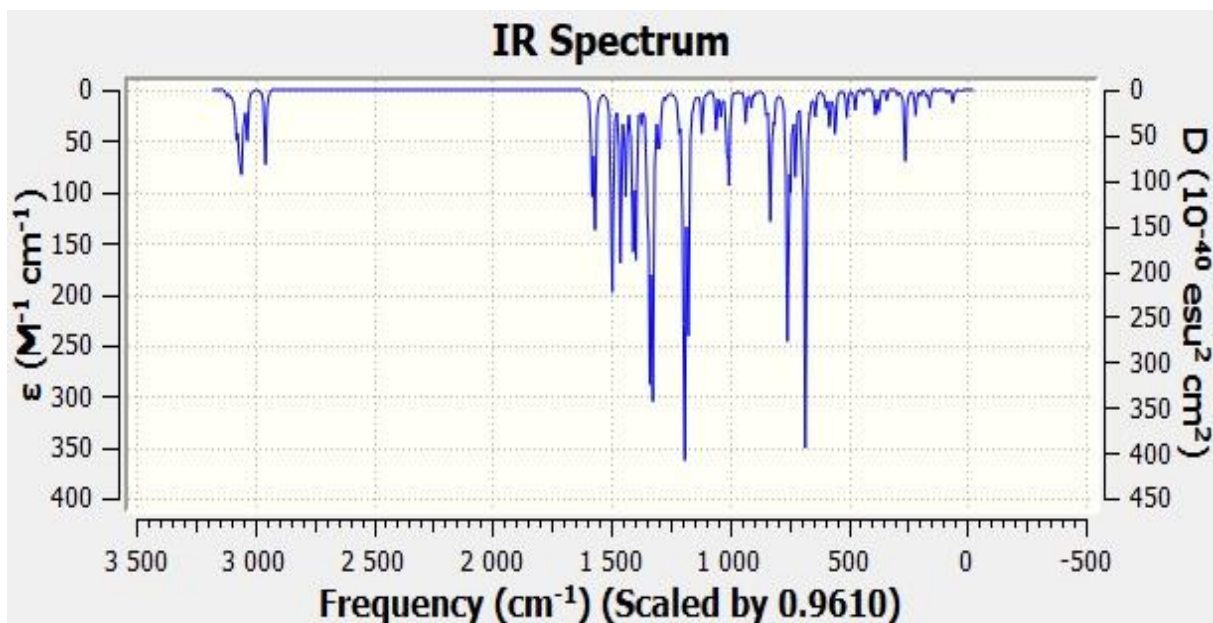

Figure S7. Theoretical FT-IR spectra of (3)

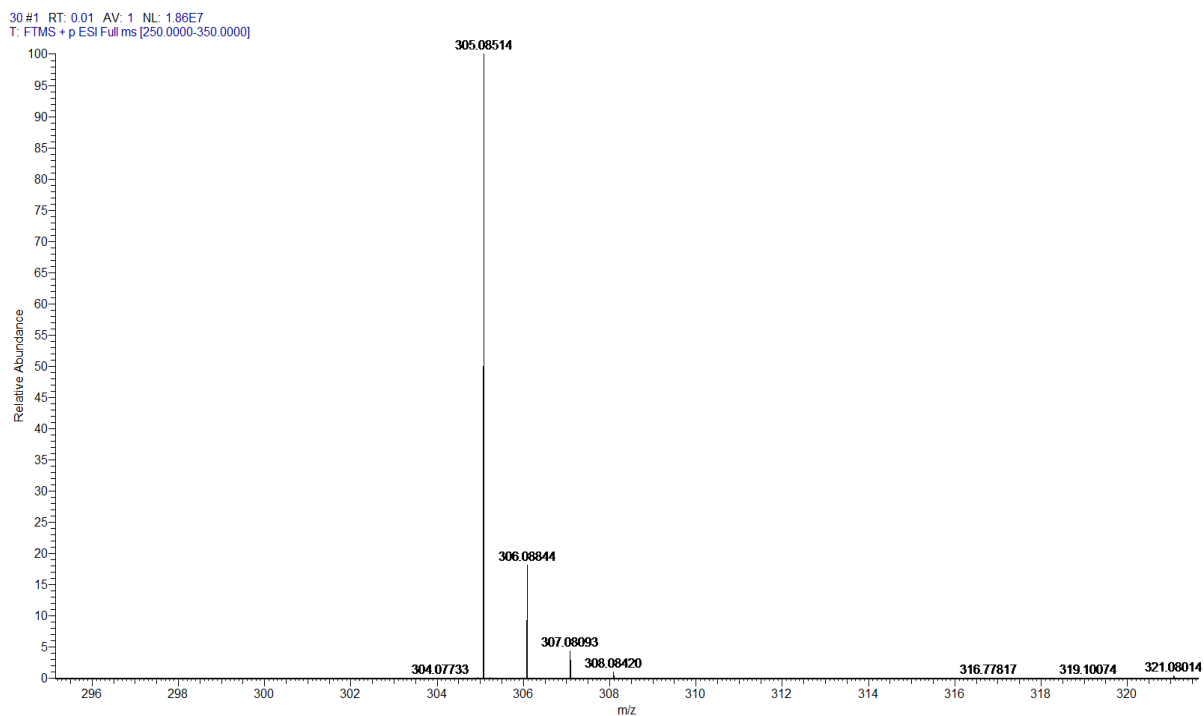

Figure S8. ESI<sup>+</sup>-MS spectra of (3)

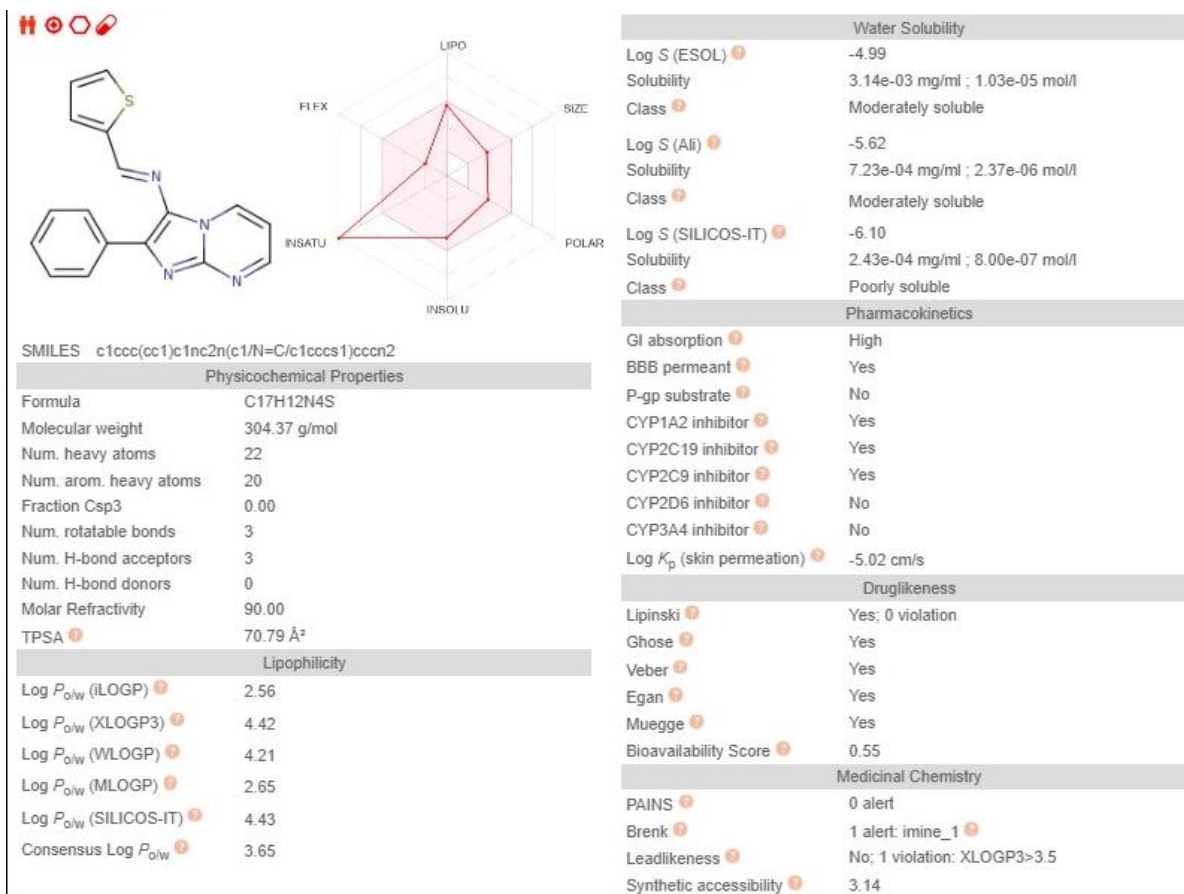

Figure S9. Pharmacokinetics and drug-likeness properties of **(3)** predicted through SwissADME server.
